# Supplementary material for: Altered Faecal Microbiota Composition and Structure of Ghanaian Children with Acute Gastroenteritis
Source: MDPI journal article supplement (doi:10.3390/ijms24043607), 2023-02-10
Supplement: s1 [file s1]

## Supplementary Materials

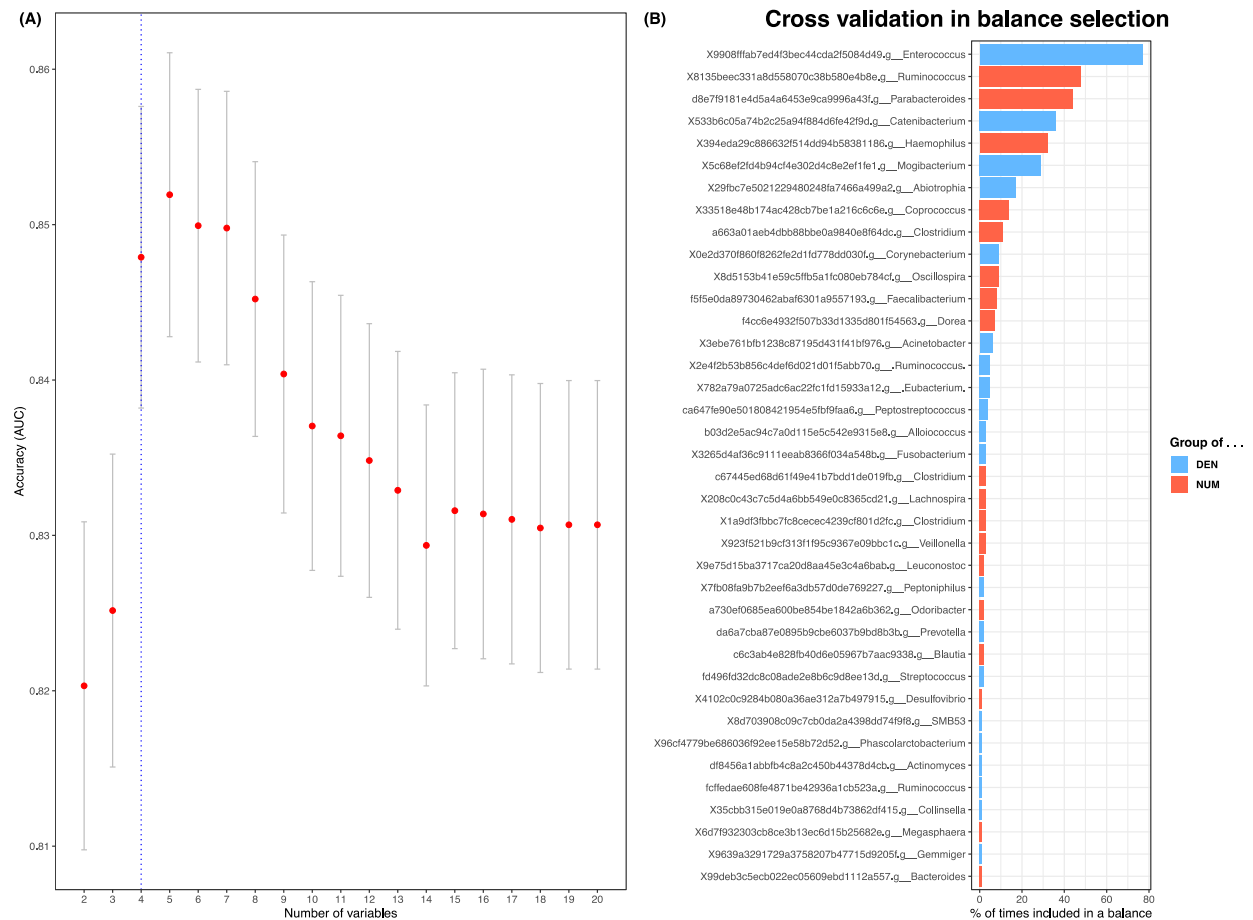

**Figure S1.** Variable and balance selection using Selbal. (A) Mean AUROC score based on the number of components in the cross-validation (CV) process. Four optimal number of components were included according to the “1se rule”, as highlighted with the vertical dashed line. (B) Bar plot of the frequency of the variables selected in the CV process. The colour represents if the variable was selected as the numerator (red) or denominator (blue) of the balance. *Alloicoccus* = *Dolosigranulum*.

**Table S1.** Simple linear model summary of alpha diversity estimates.

|                    | <b>Model A</b>   |                 | <b>Model B</b>   |                 | <b>Model C</b>   |                 |
|--------------------|------------------|-----------------|------------------|-----------------|------------------|-----------------|
|                    | $\beta$ Estimate | <i>p</i> -value | $\beta$ Estimate | <i>p</i> -value | $\beta$ Estimate | <i>p</i> -value |
| <b>Observed</b>    |                  |                 |                  |                 |                  |                 |
| Age                | 1.25             | 5.74e-04        | 0.67             | 0.13            | 0.72             | 0.13            |
| Breastfeeding      | -                | -               | -30.39           | 0.03            | -39.18           | 0.03            |
| Artificial milk    | -                | -               | -                | -               | -6.35            | 0.77            |
| Family meal        | -                | -               | -                | -               | -19.59           | 0.30            |
| Formula            | -                | -               | -                | -               | -37.71           | 0.36            |
| F-statistic        | 36.79            | 8.79e-13        | 27.02            | 6.07e-13        | 13.93            | 1.98e-11        |
| Adjusted R-squared | 0.41             | -               | 0.43             | -               | 0.43             | -               |
| <b>Shannon</b>     |                  |                 |                  |                 |                  |                 |
| Age                | 0.01             | 0.02            | 7.25e-3          | 0.30            | 5.80e-3          | 0.45            |
| Breastfeeding      | -                | -               | -0.33            | 0.15            | -0.46            | 0.11            |
| Artificial milk    | -                | -               | -                | -               | -0.23            | 0.52            |
| Family meal        | -                | -               | -                | -               | -0.18            | 0.55            |
| Formula            | -                | -               | -                | -               | -0.49            | 0.47            |
| F-statistic        | 45.06            | 8.72e-15        | 31.1             | 2.33e-14        | 15.58            | 1.63e-12        |
| Adjusted R-squared | 0.46             | -               | 0.46             | -               | 0.45             | -               |
| <b>PD</b>          |                  |                 |                  |                 |                  |                 |
| Age                | 0.06             | 6.42e-04        | 0.04             | 0.10            | 0.04             | 0.10            |
| Breastfeeding      | -                | -               | -1.31            | 0.06            | -1.72            | 0.05            |
| Artificial milk    | -                | -               | -                | -               | -0.36            | 0.74            |
| Family meal        | -                | -               | -                | -               | -0.90            | 0.33            |
| Formula            | -                | -               | -                | -               | -1.10            | 0.59            |
| F-statistic        | 33.56            | 5.99e-12        | 24.14            | 6.95e-12        | 12.19            | 3.17e-10        |
| Adjusted R-squared | 0.38             | -               | 0.40             | -               | 0.39             | -               |

-, not applicable; covariates included in the linear models were as follows: model A (age only), model B (age, breastfeeding), and model C (age, breastfeeding, artificial milk, family meal, and formula)

**Table S2.** ADONIS PERMANOVA test summary for beta diversity metrics.

|                           | <b>F-Model</b> | <b><math>R^2</math></b> | <b><math>p</math>-value</b> |
|---------------------------|----------------|-------------------------|-----------------------------|
| <b>Bray-Curtis</b>        |                |                         |                             |
| Status                    | 10.81          | 0.09                    | 0.001                       |
| Age                       | 3.01           | 0.03                    | 0.003                       |
| Gender                    | 0.74           | 0.00                    | 0.739                       |
| Breastfeeding             | 2.21           | 0.02                    | 0.010                       |
| Family meal               | 1.52           | 0.01                    | 0.087                       |
| Artificial milk           | 1.22           | 0.01                    | 0.242                       |
| Formula                   | 1.17           | 0.00                    | 0.243                       |
| <b>Weighted UniFrac</b>   |                |                         |                             |
| Status                    | 25.50          | 0.19                    | 0.001                       |
| Age                       | 5.23           | 0.04                    | 0.002                       |
| Gender                    | 0.82           | 0.00                    | 0.486                       |
| Breastfeeding             | 4.33           | 0.03                    | 0.004                       |
| Family meal               | 0.72           | 0.00                    | 0.593                       |
| Artificial milk           | 0.64           | 0.00                    | 0.642                       |
| Formula                   | 0.81           | 0.00                    | 0.546                       |
| <b>Unweighted UniFrac</b> |                |                         |                             |
| Status                    | 15.19          | 0.12                    | 0.001                       |
| Age                       | 3.88           | 0.03                    | 0.001                       |
| Gender                    | 0.62           | 0.00                    | 0.912                       |
| Breastfeeding             | 1.84           | 0.02                    | 0.053                       |
| Family meal               | 1.34           | 0.01                    | 0.162                       |
| Artificial milk           | 1.07           | 0.00                    | 0.313                       |
| Formula                   | 0.77           | 0.00                    | 0.709                       |

**Table S3.** Core genera (Venn diagram).

| <b>Group</b>     | <b>Genera</b>                                                                                                                                                                                                                                                                                                                                                                                                                                                                                                                                                                                                                                                                                  |
|------------------|------------------------------------------------------------------------------------------------------------------------------------------------------------------------------------------------------------------------------------------------------------------------------------------------------------------------------------------------------------------------------------------------------------------------------------------------------------------------------------------------------------------------------------------------------------------------------------------------------------------------------------------------------------------------------------------------|
| AGE cases        | <i>Actinomyces</i><br><i>Atopobium</i><br><i>Bifidobacterium</i><br><i>Blautia</i><br><i>Enterococcus</i><br><i>Granulicatella</i><br><i>Ligilactobacillus</i><br><i>Rothia</i><br><i>Streptococcus</i><br><i>Veillonella</i>                                                                                                                                                                                                                                                                                                                                                                                                                                                                  |
| Healthy Controls | <i>[Eubacterium]</i><br><i>[Ruminococcus]</i><br><i>Actinomyces</i><br><i>Anaerostipes</i><br><i>Bacteroides</i><br><i>Bifidobacterium</i><br><i>Blautia</i><br><i>Clostridium</i><br><i>Clostridium</i><br><i>Clostridium</i><br><i>Collinsella</i><br><i>Coprococcus</i><br><i>Dialister</i><br><i>Dorea</i><br><i>Enterococcus</i><br><i>Faecalibacterium</i><br><i>Gemmiger</i><br><i>Granulicatella</i><br><i>Haemophilus</i><br><i>Lachnospira</i><br><i>Ligilactobacillus</i><br><i>Odoribacter</i><br><i>Oscillospira</i><br><i>Parabacteroides</i><br><i>Prevotella</i><br><i>Roseburia</i><br><i>Ruminococcus</i><br><i>Streptococcus</i><br><i>Sutterella</i><br><i>Veillonella</i> |

**Table S4.** Correlation network modules and membership across all groups, AGE cases, and healthy controls.

| Group      | Module   | Co-occurring Genus-level features                                                          |
|------------|----------|--------------------------------------------------------------------------------------------|
| All groups | Module_0 | Bacteria;Bacillota;Clostridia;Clostridiales;Lachnospiraceae;[Ruminococcus];NA              |
|            |          | Bacteria;Bacillota;Clostridia;Clostridiales;Lachnospiraceae;Coprococcus;NA                 |
|            |          | Bacteria;Bacillota;Erysipelotrichi;Erysipelotrichales;Erysipelotrichaceae;[Eubacterium];NA |
|            |          | Bacteria;Bacillota;Clostridia;Clostridiales;Ruminococcaceae;Ruminococcus;NA                |
|            |          | Bacteria;Bacillota;Clostridia;Clostridiales;Ruminococcaceae;Oscillospira;NA                |
|            |          | Bacteria;Bacteroidota;Bacteroidia;Bacteroidales;Bacteroidaceae;Bacteroides;NA              |
|            |          | Bacteria;Bacillota;Clostridia;Clostridiales;Lachnospiraceae;Blautia;NA                     |
|            |          | Bacteria;Bacillota;Clostridia;Clostridiales;Lachnospiraceae;Dorea;NA                       |
|            |          | Bacteria;Bacillota;Clostridia;Clostridiales;Ruminococcaceae;Faecalibacterium;NA            |
|            | Module_1 | Bacteria;Actinomycetota;Actinobacteria;Actinomycetales;Micrococcaceae;Rothia;NA            |
|            |          | Bacteria;Bacillota;Bacilli;Lactobacillales;Carnobacteriaceae;Granulicatella;NA             |
|            |          | Bacteria;Actinomycetota;Coriobacteriia;Coriobacteriales;Coriobacteriaceae;Atopobium;NA     |
|            |          | Bacteria;Actinomycetota;Actinobacteria;Actinomycetales;Actinomycetaceae;Actinomyces;NA     |
|            |          | Bacteria;Bacillota;Bacilli;Lactobacillales;Streptococcaceae;Streptococcus;NA               |
|            | Module_2 | Bacteria;Bacillota;Clostridia;Clostridiales;Lachnospiraceae;Lachnospira;NA                 |

|  |          |                                                                                          |
|--|----------|------------------------------------------------------------------------------------------|
|  |          | Bacteria;Bacteroidota;Bacteroidia;Bacteroidales;Porphyromonadaceae;Parabacteroides;NA    |
|  |          | Bacteria;Pseudomonadota;Betaproteobacteria;Burkholderiales;Alcaligenaceae;Sutterella;NA  |
|  |          | Bacteria;Bacillota;Clostridia;Clostridiales;Lachnospiraceae;Roseburia;NA                 |
|  | Module_3 | Bacteria;Bacillota;Clostridia;Clostridiales;[Tissierellaceae];Finegoldia;NA              |
|  |          | Bacteria;Bacillota;Clostridia;Clostridiales;[Tissierellaceae];Peptoniphilus;NA           |
|  |          | Bacteria;Bacillota;Clostridia;Clostridiales;[Tissierellaceae];Anaerococcus;NA            |
|  | Module_4 | Bacteria;Bacillota;Bacilli;Bacillales;Planococcaceae;Sporosarcina;NA                     |
|  |          | Bacteria;Bacillota;Bacilli;Lactobacillales;Enterococcaceae;Vagococcus;NA                 |
|  |          | Bacteria;Bacillota;Bacilli;Bacillales;Planococcaceae;Solibacillus;NA                     |
|  | Module_5 | Bacteria;Bacillota;Clostridia;Clostridiales;Lachnospiraceae;Oribacterium;NA              |
|  |          | Bacteria;Bacillota;Clostridia;Clostridiales;Lachnospiraceae;Moryella;NA                  |
|  |          | Bacteria;Bacillota;Clostridia;Clostridiales;Lachnospiraceae;Lachnoanaerobaculum;NA       |
|  | Module_6 | Bacteria;Bacillota;Erysipelotrichi;Erysipelotrichales;Erysipelotrichaceae;Clostridium;NA |
|  |          | Bacteria;Bacillota;Clostridia;Clostridiales;Lachnospiraceae;Clostridium;NA               |
|  | Module_7 | Bacteria;Bacillota;Bacilli;Turicibacterales;Turicibacteraceae;Turicibacter;NA            |
|  |          | Bacteria;Bacillota;Clostridia;Clostridiales;Clostridiaceae;SMB53;NA                      |
|  | Module_8 | Bacteria;Spirochaetota;[Brachyspirae];[Brachyspirales];Brachyspiraceae;Brachyspira;NA    |

|  |           |                                                                                                     |
|--|-----------|-----------------------------------------------------------------------------------------------------|
|  |           | Bacteria;Pseudomonadota;Epsilonproteobacteria;Campylobacterales;Campylobacteraceae;Campylobacter;NA |
|  | Module_9  | Bacteria;Actinomycetota;Actinobacteria;Actinomycetales;Corynebacteriaceae;Corynebacterium;NA        |
|  |           | Bacteria;Bacillota;Bacilli;Bacillales;Staphylococcaceae;Staphylococcus;NA                           |
|  | Module_10 | Bacteria;Bacillota;Clostridia;Clostridiales;Ruminococcaceae;Gemmiger;NA                             |
|  |           | Bacteria;Bacteroidota;Bacteroidia;Bacteroidales;[Odoribacteraceae];Odoribacter;NA                   |
|  | Module_11 | Bacteria;Actinomycetota;Actinobacteria;Bifidobacteriales;Bifidobacteriaceae;Bifidobacterium;NA      |
|  |           | Bacteria;Bacillota;Bacilli;Lactobacillales;Lactobacillaceae;Lactobacillus;NA                        |
|  | Module_12 | Bacteria;Pseudomonadota;Gammaproteobacteria;Pasteurellales;Pasteurellaceae;Haemophilus;NA           |
|  |           | Bacteria;Bacillota;Clostridia;Clostridiales;Veillonellaceae;Veillonella;NA                          |
|  | Module_13 | Bacteria;Verrucomicrobiota;Verrucomicrobiae;Verrucomicrobiales;Verrucomicrobiaceae;Akkermansia;NA   |
|  |           | Bacteria;Bacillota;Clostridia;Clostridiales;Lachnospiraceae;Ruminococcus;NA                         |
|  | Module_14 | Archaea;Euryarchaeota;Methanobacteria;Methanobacteriales;Methanobacteriaceae;Methanobrevibacter;NA  |
|  |           | Archaea;Euryarchaeota;Methanobacteria;Methanobacteriales;Methanobacteriaceae;Methanosphaera;NA      |
|  | Module_15 | Bacteria;Bacillota;Clostridia;Clostridiales;Veillonellaceae;Dialister;NA                            |
|  |           | Bacteria;Bacteroidota;Bacteroidia;Bacteroidales;Prevotellaceae;Prevotella;NA                        |
|  | Module_16 | Bacteria;Bacillota;Clostridia;Clostridiales;[Tissierellaceae];Tissierella_Soehngenia;NA             |

|  |           |                                                                                                 |
|--|-----------|-------------------------------------------------------------------------------------------------|
|  |           | Bacteria;Bacillota;Clostridia;Clostridiales;Peptostreptococcaceae;Clostridium;NA                |
|  | Module_17 | Bacteria;Pseudomonadota;Deltaproteobacteria;Desulfovibrionales;Desulfovibrionaceae;Bilophila;NA |
|  |           | Bacteria;Bacillota;Clostridia;Clostridiales;Veillonellaceae;Phascolarctobacterium;NA            |
|  | Module_18 | Bacteria;Bacteroidota;Bacteroidia;Bacteroidales;[Paraprevotellaceae];[Prevotella];NA            |
|  |           | Bacteria;Pseudomonadota;Gammaproteobacteria;Aeromonadales;Succinivibrionaceae;Succinivibrio;NA  |



**Table S4.** Cont.

| Group     | Module   | Co-occurring Genus-level features                                                            |
|-----------|----------|----------------------------------------------------------------------------------------------|
| AGE cases | Module_0 | Bacteria;Bacillota;Clostridia;Clostridiales;Lachnospiraceae;[Ruminococcus];NA                |
|           |          | Bacteria;Bacillota;Clostridia;Clostridiales;Lachnospiraceae;Coprococcus;NA                   |
|           |          | Bacteria;Bacillota;Erysipelotrichi;Erysipelotrichales;Erysipelotrichaceae;Catenibacterium;NA |
|           |          | Bacteria;Bacillota;Erysipelotrichi;Erysipelotrichales;Erysipelotrichaceae;[Eubacterium];NA   |
|           |          | Bacteria;Bacillota;Clostridia;Clostridiales;Ruminococcaceae;Gemmiger;NA                      |
|           |          | Bacteria;Bacillota;Clostridia;Clostridiales;Lachnospiraceae;Blautia;NA                       |
|           |          | Bacteria;Bacillota;Clostridia;Clostridiales;Lachnospiraceae;Dorea;NA                         |
|           | Module_1 | Bacteria;Bacillota;Clostridia;Clostridiales;[Tissierellaceae];Finegoldia;NA                  |
|           |          | Bacteria;Bacillota;Clostridia;Clostridiales;[Tissierellaceae];Peptoniphilus;NA               |
|           |          | Bacteria;Bacillota;Clostridia;Clostridiales;[Tissierellaceae];Anaerococcus;NA                |
|           |          | Bacteria;Bacillota;Clostridia;Clostridiales;Peptostreptococcaceae;Peptostreptococcus;NA      |
|           | Module_2 | Bacteria;Bacillota;Bacilli;Lactobacillales;Carnobacteriaceae;Granulicatella;NA               |
|           |          | Bacteria;Actinomycetota;Coriobacteriia;Coriobacteriales;Coriobacteriaceae;Atopobium;NA       |
|           |          | Bacteria;Actinomycetota;Actinobacteria;Actinomycetales;Actinomycetaceae;Actinomyces;NA       |
|           | Module_3 | Bacteria;Bacillota;Bacilli;Bacillales;Planococcaceae;Sporosarcina;NA                         |
|           |          | Bacteria;Pseudomonadota;Alphaproteobacteria;Rhizobiales;Brucellaceae;Pseudochrobactrum;NA    |

|  |           |                                                                                                            |
|--|-----------|------------------------------------------------------------------------------------------------------------|
|  |           |                                                                                                            |
|  |           | Bacteria; Bacillota; Bacilli; Bacillales; Planococcaceae; Solibacillus; NA                                 |
|  | Module_4  | Bacteria; Bacillota; Clostridia; Clostridiales; Veillonellaceae; Dialister; NA                             |
|  |           | Bacteria; Bacteroidota; Bacteroidia; Bacteroidales; Prevotellaceae; Prevotella; NA                         |
|  |           | Bacteria; Pseudomonadota; Betaproteobacteria; Burkholderiales; Alcaligenaceae; Sutterella; NA              |
|  | Module_5  | Bacteria; Bacillota; Clostridia; Clostridiales; [Tissierellaceae]; Tissierella_Soehngenii; NA              |
|  |           | Archaea; Euryarchaeota; Methanobacteria; Methanobacteriales; Methanobacteriaceae; Methanobrevibacter; NA   |
|  |           | Bacteria; Pseudomonadota; Gammaproteobacteria; Pseudomonadales; Moraxellaceae; Psychrobacter; NA           |
|  | Module_6  | Bacteria; Actinomycetota; Actinobacteria; Actinomycetales; Micrococcaceae; Rothia; NA                      |
|  |           | Bacteria; Bacillota; Bacilli; Lactobacillales; Streptococcaceae; Streptococcus; NA                         |
|  | Module_7  | Bacteria; Actinomycetota; Actinobacteria; Bifidobacteriales; Bifidobacteriaceae; Gardnerella; NA           |
|  |           | Bacteria; Bacillota; Bacilli; Lactobacillales; Aerococcaceae; Aerococcus; NA                               |
|  | Module_8  | Bacteria; Bacillota; Clostridia; Clostridiales; Lachnospiraceae; Moryella; NA                              |
|  |           | Bacteria; Bacillota; Clostridia; Clostridiales; Lachnospiraceae; Lachnoanaerobaculum; NA                   |
|  | Module_9  | Bacteria; Spirochaetota; [Brachyspirae]; [Brachyspirales]; Brachyspiraceae; Brachyspira; NA                |
|  |           | Bacteria; Pseudomonadota; Epsilonproteobacteria; Campylobacteriales; Campylobacteraceae; Campylobacter; NA |
|  | Module_10 | Bacteria; Bacteroidota; Bacteroidia; Bacteroidales; Bacteroidaceae; Bacteroides; NA                        |

|  |           |                                                                                                      |
|--|-----------|------------------------------------------------------------------------------------------------------|
|  |           | Bacteria; Bacillota; Clostridia; Clostridiales; Ruminococcaceae; Faecalibacterium; NA                |
|  | Module_11 | Bacteria; Actinomycetota; Actinobacteria; Bifidobacteriales; Bifidobacteriaceae; Bifidobacterium; NA |
|  |           | Bacteria; Bacillota; Bacilli; Lactobacillales; Lactobacillaceae; Lactobacillus; NA                   |
|  | Module_12 | Bacteria; Pseudomonadota; Gammaproteobacteria; Enterobacteriales; Enterobacteriaceae; Morganella; NA |
|  |           | Bacteria; Bacteroidota; Bacteroidia; Bacteroidales; Porphyromonadaceae; Parabacteroides; NA          |
|  | Module_13 | Bacteria; Actinomycetota; Actinobacteria; Actinomycetales; Corynebacteriaceae; Corynebacterium; NA   |
|  |           | Bacteria; Bacillota; Bacilli; Bacillales; Staphylococcaceae; Staphylococcus; NA                      |
|  | Module_14 | Bacteria; Pseudomonadota; Gammaproteobacteria; Pasteurellales; Pasteurellaceae; Haemophilus; NA      |
|  |           | Bacteria; Bacillota; Clostridia; Clostridiales; Veillonellaceae; Veillonella; NA                     |
|  | Module_15 | Bacteria; Bacillota; Clostridia; Clostridiales; Ruminococcaceae; Oscillospira; NA                    |
|  |           | Bacteria; Bacillota; Clostridia; Clostridiales; Lachnospiraceae; Roseburia; NA                       |
|  | Module_16 | Bacteria; Bacillota; Clostridia; Clostridiales; Lachnospiraceae; Lachnospira; NA                     |
|  |           | Bacteria; Bacillota; Clostridia; Clostridiales; Veillonellaceae; Phascolarctobacterium; NA           |
|  | Module_17 | Bacteria; Actinomycetota; Coriobacteriia; Coriobacteriales; Coriobacteriaceae; Enterococcus; NA      |
|  |           | Bacteria; Bacteroidota; Bacteroidia; Bacteroidales; Porphyromonadaceae; Petrimonas; NA               |

**Table S4.** Cont.

| Group   | Module   | Co-occurring Genus-level features                                                            |
|---------|----------|----------------------------------------------------------------------------------------------|
| Healthy | Module_0 | Bacteria;Actinomycetota;Actinobacteria;Actinomycetales;Micrococcaceae;Rothia;NA              |
|         |          | Bacteria;Bacillota;Bacilli;Bacillales;Staphylococcaceae;Staphylococcus;NA                    |
|         |          | Bacteria;Actinomycetota;Coriobacteriia;Coriobacteriales;Coriobacteriaceae;Atopobium;NA       |
|         |          | Bacteria;Bacillota;Bacilli;Lactobacillales;Leuconostocaceae;Weissella;NA                     |
|         |          | Bacteria;Bacillota;Bacilli;Lactobacillales;Lactobacillaceae;Pediococcus;NA                   |
|         |          | Bacteria;Bacillota;Bacilli;Lactobacillales;Streptococcaceae;Streptococcus;NA                 |
|         | Module_1 | Bacteria;Bacillota;Clostridia;Clostridiales;Lachnospiraceae;[Ruminococcus];NA                |
|         |          | Bacteria;Bacillota;Clostridia;Clostridiales;Lachnospiraceae;Coprococcus;NA                   |
|         |          | Bacteria;Bacillota;Clostridia;Clostridiales;Lachnospiraceae;Blautia;NA                       |
|         |          | Bacteria;Bacillota;Clostridia;Clostridiales;Lachnospiraceae;Dorea;NA                         |
|         |          | Bacteria;Bacillota;Clostridia;Clostridiales;Ruminococcaceae;Faecalibacterium;NA              |
|         | Module_2 | Bacteria;Pseudomonadota;Gammaproteobacteria;Pseudomonadales;Moraxellaceae;Acinetobacter;NA   |
|         |          | Bacteria;Pseudomonadota;Alphaproteobacteria;Rhodospirillales;Acetobacteraceae;Acetobacter;NA |
|         |          | Bacteria;Bacillota;Bacilli;Lactobacillales;Leuconostocaceae;Leuconostoc;NA                   |
|         |          | Bacteria;Actinomycetota;Actinobacteria;Actinomycetales;Actinomycetaceae;Actinomyces;NA       |
|         |          | Bacteria;Bacillota;Clostridia;Clostridiales;Lachnospiraceae;Lachnospira;NA                   |

|  |          |                                                                                                 |
|--|----------|-------------------------------------------------------------------------------------------------|
|  | Module_3 |                                                                                                 |
|  |          | Bacteria;Bacillota;Clostridia;Clostridiales;Ruminococcaceae;Ruminococcus;NA                     |
|  |          | Bacteria;Bacillota;Clostridia;Clostridiales;Lachnospiraceae;Roseburia;NA                        |
|  | Module_4 | Bacteria;Actinomycetota;Coriobacteriia;Coriobacteriales;Coriobacteriaceae;Eggerthella;NA        |
|  |          | Bacteria;Bacillota;Erysipelotrichi;Erysipelotrichales;Erysipelotrichaceae;Clostridium;NA        |
|  |          | Bacteria;Bacillota;Clostridia;Clostridiales;Lachnospiraceae;Clostridium;NA                      |
|  | Module_5 | Bacteria;Pseudomonadota;Deltaproteobacteria;Desulfovibrionales;Desulfovibrionaceae;Bilophila;NA |
|  |          | Bacteria;Bacillota;Clostridia;Clostridiales;Veillonellaceae;Phascolarctobacterium;NA            |
|  |          | Bacteria;Pseudomonadota;Betaproteobacteria;Burkholderiales;Alcaligenaceae;Sutterella;NA         |
|  | Module_6 | Bacteria;Pseudomonadota;Betaproteobacteria;Neisseriales;Neisseriaceae;Neisseria;NA              |
|  |          | Bacteria;Pseudomonadota;Gammaproteobacteria;Pseudomonadales;Pseudomonadaceae;Pseudomonas;NA     |
|  |          | Bacteria;Bacillota;Clostridia;Clostridiales;Lachnospiraceae;Moryella;NA                         |
|  | Module_7 | Bacteria;Bacillota;Clostridia;Clostridiales;Ruminococcaceae;Oscillospira;NA                     |
|  |          | Bacteria;Bacteroidota;Bacteroidia;Bacteroidales;Bacteroidaceae;Bacteroides;NA                   |
|  |          | Bacteria;Bacteroidota;Bacteroidia;Bacteroidales;Porphyromonadaceae;Parabacteroides;NA           |
|  | Module_8 | Bacteria;Pseudomonadota;Gammaproteobacteria;Pasteurellales;Pasteurellaceae;Haemophilus;NA       |
|  |          | Bacteria;Bacillota;Clostridia;Clostridiales;Veillonellaceae;Veillonella;NA                      |
|  |          | Bacteria;Bacteroidota;Bacteroidia;Bacteroidales;[Odoribacteraceae];Odoribacter;NA               |

|  |           |                                                                                                     |
|--|-----------|-----------------------------------------------------------------------------------------------------|
|  | Module_9  |                                                                                                     |
|  |           | Bacteria;Bacteroidota;Bacteroidia;Bacteroidales;Prevotellaceae;Prevotella;NA                        |
|  | Module_10 | Bacteria;Bacillota;Clostridia;Clostridiales;Lachnospiraceae;Anaerostipes;NA                         |
|  |           | Bacteria;Bacillota;Clostridia;Clostridiales;Ruminococcaceae;Gemmiger;NA                             |
|  | Module_11 | Bacteria;Actinomycetota;Actinobacteria;Bifidobacteriales;Bifidobacteriaceae;Bifidobacterium;NA      |
|  |           | Bacteria;Bacillota;Bacilli;Lactobacillales;Lactobacillaceae;Lactobacillus;NA                        |
|  | Module_12 | Archaea;Euryarchaeota;Methanobacteria;Methanobacteriales;Methanobacteriaceae;Methanobrevibacter;NA  |
|  |           | Archaea;Euryarchaeota;Methanobacteria;Methanobacteriales;Methanobacteriaceae;Methanosphaera;NA      |
|  | Module_13 | Bacteria;Pseudomonadota;Gammaproteobacteria;Aeromonadales;Succinivibrionaceae;Succinivibrio;NA      |
|  |           | Bacteria;Bacillota;Clostridia;Clostridiales;Lachnospiraceae;Butyrivibrio;NA                         |
|  | Module_14 | Bacteria;Bacillota;Bacilli;Turicibacterales;Turicibacteraceae;Turicibacter;NA                       |
|  |           | Bacteria;Bacillota;Clostridia;Clostridiales;Clostridiaceae;SMB53;NA                                 |
|  | Module_15 | Bacteria;Verrucomicrobiota;Verrucomicrobiae;Verrucomicrobiales;Verrucomicrobiaceae;Akkermansia;NA   |
|  |           | Bacteria;Bacillota;Clostridia;Clostridiales;Lachnospiraceae;Ruminococcus;NA                         |
|  | Module_16 | Bacteria;Actinomycetota;Actinobacteria;Actinomycetales;Corynebacteriaceae;Corynebacterium;NA        |
|  |           | Bacteria;Bacillota;Bacilli;Lactobacillales;Carnobacteriaceae;Granulicatella;NA                      |
|  | Module_17 | Bacteria;Pseudomonadota;Deltaproteobacteria;Desulfovibrionales;Desulfovibrionaceae;Desulfovibrio;NA |

|  |           |                                                                                              |
|--|-----------|----------------------------------------------------------------------------------------------|
|  |           | Bacteria;Pseudomonadota;Betaproteobacteria;Burkholderiales;Oxalobacteraceae;Oxalobacter;NA   |
|  | Module_18 | Bacteria;Bacillota;Erysipelotrichi;Erysipelotrichales;Erysipelotrichaceae;Catenibacterium;NA |
|  |           | Bacteria;Bacteroidota;Bacteroidia;Bacteroidales;[Paraprevotellaceae];[Prevotella];NA         |
